# Supplementary material for: N-Doped celery-based biomass carbon with tunable Co3O4 loading for enhanced-performance of solid-state supercapacitors
Source: Royal Society of Chemistry journal article supplement (doi:10.1039/d1nj05298e), 2021-12-31
Supplement: d1nj05298e1.pdf [file d1nj05298e1.pdf]

**N-doped celery-based biomass carbon with tunable Co<sub>3</sub>O<sub>4</sub> loading for enhanced-  
performance solid-state supercapacitor**

Zihan Lin, Xiubo Xie\*, Dan Wu, Xiangyang Feng, Mengna Chen, Xuexue Jia, Yue

Sun, Yanting Qin, Yupeng Qi, Wei Du\*

School of Environmental and Material Engineering, Yantai University, No. 30

Qingquan Road, Yantai, 264005, China

\*Corresponding author: Email address: [xiuboxie@ytu.edu.cn](mailto:xiuboxie@ytu.edu.cn); [duwei@ytu.edu.cn](mailto:duwei@ytu.edu.cn)

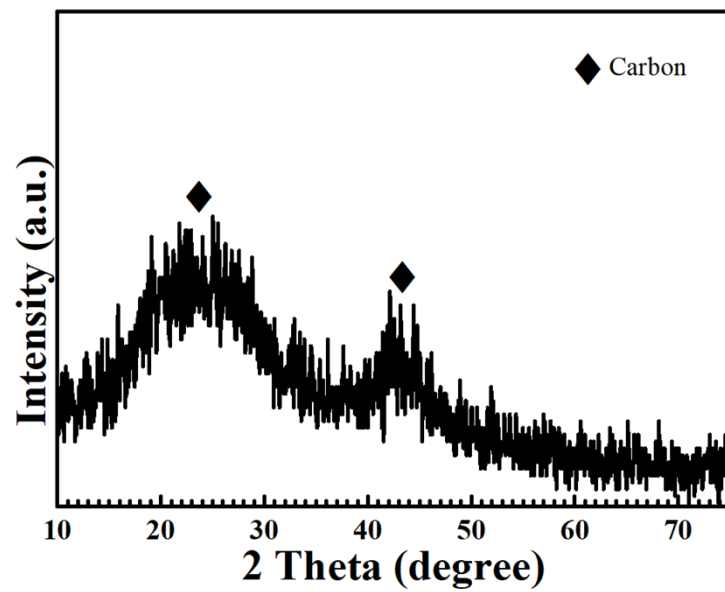

**Fig. S1** XRD pattern of the pure celery

**Fig. S2** XRD pattern of the  $\text{Co}_3\text{O}_4$  particles

**Fig. S3** SEM image of the  $\text{Co}_3\text{O}_4$  particles

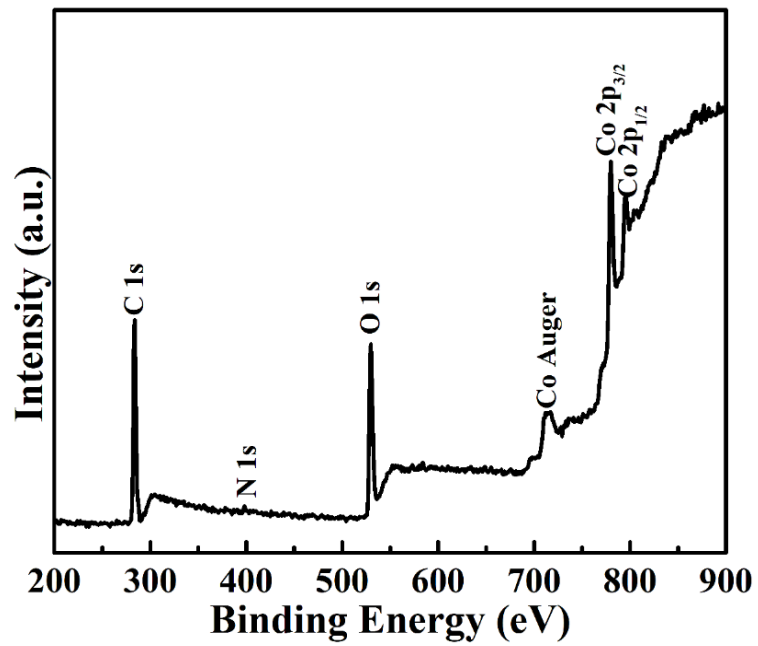

Fig. S4 XPS survey spectra of the celery/150%Co<sub>3</sub>O<sub>4</sub> sample

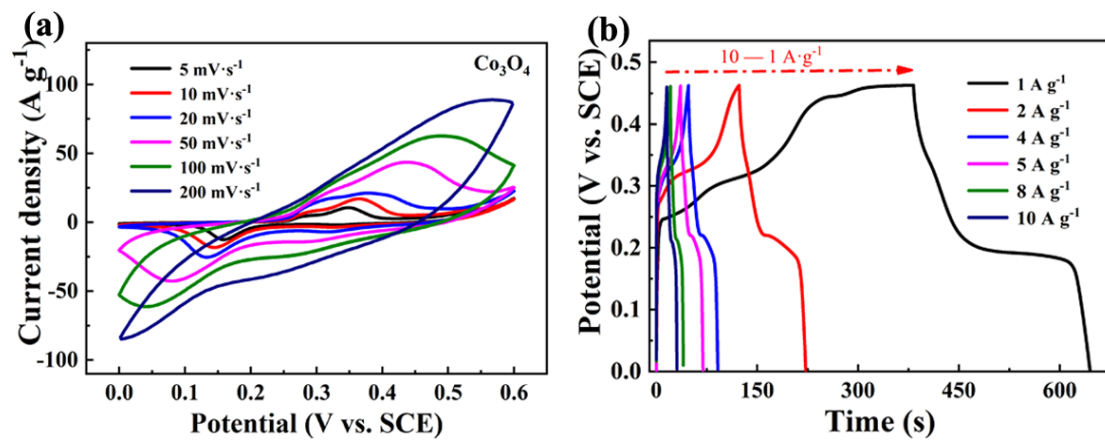

Fig. S5 (a) CV curves electrode at different scan rates, (b) GCD curves at 1-10  $\text{A g}^{-1}$

of  $\text{Co}_3\text{O}_4$  electrode

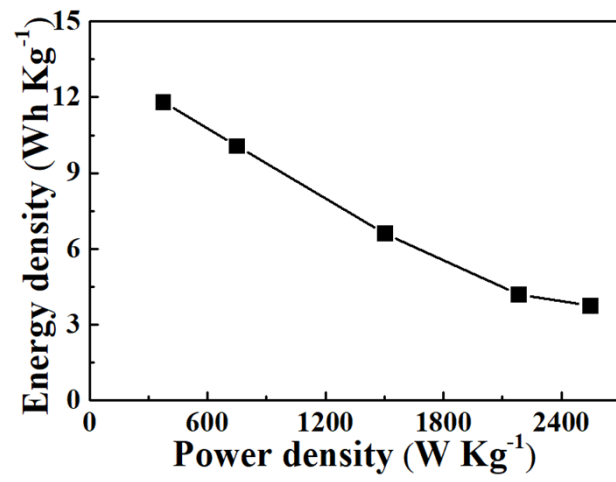

**Fig. S6** Ragone plot of celery/150%Co<sub>3</sub>O<sub>4</sub> composite
